# Supplementary material for: Structure, Biology, and Therapeutic Application of Toxin–Antitoxin Systems in Pathogenic Bacteria
Source: PubMed Central journal article supplement (PMC5086665; doi:10.3390/toxins8100305), 2016-10-22
Supplement: toxins-08-00305-s001.pdf [file toxins-08-00305-s001.pdf]

# Supplementary Materials: Structure, Biology, and Therapeutic Application of Toxin-Antitoxin Systems in Pathogenic Bacteria

Ki-Young Lee and Bong-Jin Lee

**Table S1.** Toxin–Antitoxin pairs of human pathogenic bacteria addressed in the text. The information on TA pairs was collected from the web-based TA database (TADB) [1]. The minus sign indicates “Not Applicable”.

| Bacterial Species                       | Classification (Family/Domain) | Toxin              | Antitoxin          | Regulator | Experimental Validation |
|-----------------------------------------|--------------------------------|--------------------|--------------------|-----------|-------------------------|
| <i>Streptococcus pyogenes</i> M1 GAS    | RelBE or parDE/RHH-RelE        | SPy_0552           | SPy_0550           | –         | –                       |
| <i>Streptococcus pyogenes</i> M1 GAS    | mazEF/Xre-MazF                 | SPy_0938           | SPy_0939           | –         | –                       |
| <i>Streptococcus pyogenes</i> M1 GAS    | -/-                            | SPy_1248           | SPy_1249           | –         | –                       |
| <i>Streptococcus pyogenes</i> M1 GAS    | parDE/RHH-RelE                 | SPy_1927           | SPy_1926           | –         | –                       |
| <i>Streptococcus pyogenes</i> M1 GAS    | -/Xre-Bro                      | SPy_2128           | SPy_2127           | –         | –                       |
| <i>Streptococcus pyogenes</i> MGAS10270 | RelBE or parDE/RHH-RelE        | MGAS10270_S py0458 | MGAS10270_S py0456 | –         | –                       |
| <i>Streptococcus pyogenes</i> MGAS10270 | -/-                            | MGAS10270_S py0548 | MGAS10270_S py0549 | –         | –                       |
| <i>Streptococcus pyogenes</i> MGAS10270 | hicBA/HicB-HicA                | MGAS10270_S py0569 | MGAS10270_S py0568 | –         | –                       |
| <i>Streptococcus pyogenes</i> MGAS10270 | -/Xre-COG2856                  | MGAS10270_S py0800 | MGAS10270_S py0801 | –         | –                       |
| <i>Streptococcus pyogenes</i> MGAS10270 | -/-                            | MGAS10270_S py1346 | MGAS10270_S py1347 | –         | –                       |
| <i>Streptococcus pyogenes</i> MGAS10270 | -/Xre-COG2856                  | MGAS10270_S py1359 | MGAS10270_S py1358 | –         | –                       |
| <i>Streptococcus pyogenes</i> MGAS10270 | -/Xre-COG2856                  | MGAS10270_S py1405 | MGAS10270_S py1404 | –         | –                       |
| <i>Streptococcus pyogenes</i> MGAS10270 | mazEF, ccd or relBE/RHH-MazF   | MGAS10270_S py1407 | MGAS10270_S py1408 | –         | –                       |
| <i>Streptococcus pyogenes</i> MGAS10270 | RelBE or parDE/RHH-RelE        | MGAS10270_S py1710 | MGAS10270_S py1709 | –         | –                       |

|                                         |                         |                    |                    |   |   |
|-----------------------------------------|-------------------------|--------------------|--------------------|---|---|
| <i>Streptococcus pyogenes</i> MGAS10270 | RelBE or parDE/RHH-RelE | MGAS10270_S py1927 | MGAS10270_S py1928 | - | - |
| <i>Streptococcus pyogenes</i> MGAS10750 | RelBE or parDE/RHH-RelE | MGAS10750_S py0477 | MGAS10750_S py0475 | - | - |
| <i>Streptococcus pyogenes</i> MGAS10750 | hicBA/HicB-HicA         | MGAS10750_S py0594 | MGAS10750_S py0593 | - | - |
| <i>Streptococcus pyogenes</i> MGAS10750 | -/Xre-COG2856           | MGAS10750_S py0835 | MGAS10750_S py0836 | - | - |
| <i>Streptococcus pyogenes</i> MGAS10750 | -/Xre-COG2856           | MGAS10750_S py1713 | MGAS10750_S py1714 | - | - |
| <i>Streptococcus pyogenes</i> MGAS10750 | RelBE or parDE/RHH-RelE | MGAS10750_S py1738 | MGAS10750_S py1737 | - | - |
| <i>Streptococcus pyogenes</i> MGAS10750 | -/Xre-Bro               | MGAS10750_S py1901 | MGAS10750_S py1900 | - | - |
| <i>Streptococcus pyogenes</i> MGAS2096  | RelBE or parDE/RHH-RelE | MGAS2096_S py0476  | MGAS2096_S py0475  | - | - |
| <i>Streptococcus pyogenes</i> MGAS2096  | -/Xre-COG2856           | MGAS2096_S py1490  | MGAS2096_S py1489  | - | - |
| <i>Streptococcus pyogenes</i> MGAS2096  | RelBE or parDE/RHH-RelE | MGAS2096_S py1666  | MGAS2096_S py1665  | - | - |
| <i>Streptococcus pyogenes</i> MGAS315   | parDE/RHH-RelE          | SpyM3_0394         | SpyM3_0393         | - | - |
| <i>Streptococcus pyogenes</i> MGAS315   | -/Xre-COG2856           | SpyM3_0683         | SpyM3_0684         | - | - |
| <i>Streptococcus pyogenes</i> MGAS315   | -/Xre-Bro               | SpyM3_0687         | SpyM3_0688         | - | - |
| <i>Streptococcus pyogenes</i> MGAS315   | -/Xre-COG2856           | SpyM3_1264         | SpyM3_1263         | - | - |
| <i>Streptococcus pyogenes</i> MGAS315   | -/Xre-COG2856           | SpyM3_1351         | SpyM3_1350         | - | - |
| <i>Streptococcus pyogenes</i> MGAS315   | -/Xre-COG2856           | SpyM3_1456         | SpyM3_1455         | - | - |
| <i>Streptococcus pyogenes</i> MGAS315   | parDE/RHH-RelE          | SpyM3_1662         | SpyM3_1661         | - | - |
| <i>Streptococcus pyogenes</i> MGAS5005  | RelBE or parDE/RHH-RelE | M5005_Spy_0457     | M5005_Spy_0456     | - | - |
| <i>Streptococcus pyogenes</i> MGAS5005  | -/Xre-COG2856           | M5005_Spy_1220     | M5005_Spy_1219     | - | - |

---

|                                        |                              |                  |                  |   |   |
|----------------------------------------|------------------------------|------------------|------------------|---|---|
| <i>Streptococcus pyogenes</i> MGAS5005 | -/Xre-COG2856                | M5005_Spy_1465   | M5005_Spy_1464   | - | - |
| <i>Streptococcus pyogenes</i> MGAS5005 | RelBE or parDE/RHH-RelE      | M5005_Spy_1641   | M5005_Spy_1640   | - | - |
| <i>Streptococcus pyogenes</i> MGAS6180 | RelBE or parDE/RHH-RelE      | M28_Spy0445      | M28_Spy0444      | - | - |
| <i>Streptococcus pyogenes</i> MGAS6180 | mazEF/Xre-MazF               | M28_Spy1031      | M28_Spy1030      | - | - |
| <i>Streptococcus pyogenes</i> MGAS6180 | -/Xre-COG2856                | M28_Spy1283      | M28_Spy1282      | - | - |
| <i>Streptococcus pyogenes</i> MGAS6180 | -/Xre-COG2856                | M28_Spy1331      | M28_Spy1330      | - | - |
| <i>Streptococcus pyogenes</i> MGAS6180 | mazEF, ccd or relBE/RHH-MazF | M28_Spy1333      | M28_Spy1334      | - | - |
| <i>Streptococcus pyogenes</i> MGAS6180 | RelBE or parDE/RHH-RelE      | M28_Spy1631      | M28_Spy1630      | - | - |
| <i>Streptococcus pyogenes</i> MGAS6180 | RelBE or parDE/RHH-RelE      | M28_Spy1840      | M28_Spy1841      | - | - |
| <i>Streptococcus pyogenes</i> MGAS8232 | -/Xre-COG2856                | spyM18_0339      | spyM18_0340      | - | - |
| <i>Streptococcus pyogenes</i> MGAS8232 | -/Xre-Bro                    | spyM18_0344      | spyM18_0345      | - | - |
| <i>Streptococcus pyogenes</i> MGAS8232 | parDE/RHH-RelE               | spyM18_0617      | spyM18_0616      | - | - |
| <i>Streptococcus pyogenes</i> MGAS8232 | -/Xre-Bro                    | spyM18_0723      | spyM18_0722      | - | - |
| <i>Streptococcus pyogenes</i> MGAS8232 | hicBA/HicB-HicA              | spyM18_0747      | spyM18_0746      | - | - |
| <i>Streptococcus pyogenes</i> MGAS8232 | mazEF/Xre-MazF               | spyM18_1307      | spyM18_1306      | - | - |
| <i>Streptococcus pyogenes</i> MGAS8232 | -/Xre-Bro                    | spyM18_1802      | spyM18_1804      | - | - |
| <i>Streptococcus pyogenes</i> MGAS8232 | parDE/RHH-RelE               | spyM18_1995      | spyM18_1994      | - | - |
| <i>Streptococcus pyogenes</i> MGAS9429 | RelBE or parDE/RHH-RelE      | MGAS9429_Spy0456 | MGAS9429_Spy0455 | - | - |
| <i>Streptococcus pyogenes</i> MGAS9429 | hicBA/HicB-HicA              | MGAS9429_Spy0565 | MGAS9429_Spy0564 | - | - |

---

|                                             |                         |                  |                  |              |   |
|---------------------------------------------|-------------------------|------------------|------------------|--------------|---|
| <i>Streptococcus pyogenes</i> MGAS9429      | -/Xre-Bro               | MGAS9429_Spy0799 | MGAS9429_Spy0798 | -            | - |
| <i>Streptococcus pyogenes</i> MGAS9429      | -/Xre-COG2856           | MGAS9429_Spy1467 | MGAS9429_Spy1466 | -            | - |
| <i>Streptococcus pyogenes</i> MGAS9429      | RelBE or parDE/RHH-RelE | MGAS9429_Spy1644 | MGAS9429_Spy1643 | -            | - |
| <i>Streptococcus pyogenes</i> SSI-1         | -/Xre-COG2856           | SPs0410          | SPs0411          | -            | - |
| <i>Streptococcus pyogenes</i> SSI-1         | -/Xre-COG2856           | SPs0513          | SPs0514          | -            | - |
| <i>Streptococcus pyogenes</i> SSI-1         | -/Xre-COG2856           | SPs0599          | SPs0600          | -            | - |
| <i>Streptococcus pyogenes</i> SSI-1         | -/Xre-Bro               | SPs1163          | SPs1162          | -            | - |
| <i>Streptococcus pyogenes</i> SSI-1         | -/Xre-COG2856           | SPs1169          | SPs1168          | -            | - |
| <i>Streptococcus pyogenes</i> SSI-1         | parDE/RHH-RelE          | SPs1460          | SPs1461          | -            | - |
| <i>Streptococcus pyogenes</i> SSI-1         | parDE/RHH-RelE          | SPs1660          | SPs1659          | -            | - |
| <i>Streptococcus pyogenes</i> str. Manfredo | -/Xre-COG2856           | SpyM50473        | SpyM50474        | -            | - |
| <i>Streptococcus pyogenes</i> str. Manfredo | -/Xre-Bro               | SpyM50476        | SpyM50475        | -            | - |
| <i>Streptococcus pyogenes</i> str. Manfredo | -/Xre-COG2856           | SpyM50633        | SpyM50634        | -            | - |
| <i>Streptococcus pyogenes</i> str. Manfredo | -/Xre-COG2856           | SpyM51068        | SpyM51067        | -            | - |
| <i>Streptococcus pyogenes</i> str. Manfredo | hicBA/HicB-HicA         | SpyM51292        | SpyM51293        | -            | - |
| <i>Streptococcus pyogenes</i> str. Manfredo | -/Xre-Bro               | SpyM51316        | SpyM51317        | -            | - |
| <i>Streptococcus pyogenes</i> str. Manfredo | RelBE or parDE/RHH-RelE | SpyM51406        | SpyM51407        | -            | - |
| <i>Streptococcus pyogenes</i> str. Manfredo | RelBE or parDE/RHH-RelE | SpyM51616        | SpyM51615        | -            | - |
| <i>Streptococcus pyogenes</i> (plasmid)     | omega-epsilon-zeta/-    | pSM19035_009     | pSM19035_008     | pSM19035_007 | o |

|                                              |                                |                  |                  |              |   |
|----------------------------------------------|--------------------------------|------------------|------------------|--------------|---|
| <i>Streptococcus pyogenes</i> (plasmid)      | omega-epsilon-zeta/-           | pSM19035_012     | pSM19035_013     | pSM19035_014 | o |
| <i>Streptococcus pyogenes</i> (plasmid)      | -/-                            | pSM19035_013     | pSM19035_012     | -            | - |
| <i>Streptococcus pneumoniae</i>              | pezAT/(antitoxin)              | Orf8             | Orf9             | -            | - |
| <i>Streptococcus pneumoniae</i> CGSP14       | RelBE or parDE/RHH-RelE        | SPCG_0287        | SPCG_0286        | -            | - |
| <i>Streptococcus pneumoniae</i> CGSP14       | phd-doc/AbrB-Fic               | SPCG_0839        | SPCG_0838        | -            | - |
| <i>Streptococcus pneumoniae</i> CGSP14       | RelBE or parDE/RHH-RelE        | SPCG_1079        | SPCG_1078        | -            | - |
| <i>Streptococcus pneumoniae</i> CGSP14       | relBE or parDE/PHD-RelE        | SPCG_1714        | SPCG_1715        | -            | - |
| <i>Streptococcus pneumoniae</i> CGSP14       | -/Xre-COG2856                  | SPCG_1910        | SPCG_1965        | -            | - |
| <i>Streptococcus pneumoniae</i> D39          | RelBE or parDE/RHH-RelE        | SPD_0256         | SPD_0255         | -            | - |
| <i>Streptococcus pneumoniae</i> D39          | RelBE or parDE/RHH-RelE        | SPD_1081         | SPD_1082         | -            | - |
| <i>Streptococcus pneumoniae</i> D39          | relBE or parDE/PHD-RelE        | SPD_1550         | SPD_1551         | -            | - |
| <i>Streptococcus pneumoniae</i> G54          | RelBE or parDE/RHH-RelE        | SPG_0259         | SPG_0258         | -            | - |
| <i>Streptococcus pneumoniae</i> G54          | phd-doc/AbrB-Fic               | SPG_0815         | SPG_0814         | -            | - |
| <i>Streptococcus pneumoniae</i> G54          | RelBE or parDE/RHH-RelE        | SPG_1114         | SPG_1115         | -            | - |
| <i>Streptococcus pneumoniae</i> G54          | hicBA/HicB-HicA                | SPG_1676         | SPG_1675         | -            | - |
| <i>Streptococcus pneumoniae</i> G54          | -/Xre-COG2856                  | SPG_1845         | SPG_1846         | -            | - |
| <i>Streptococcus pneumoniae</i> gamPNI0373   | omega-epsilon-zeta/(antitoxin) | HMPREF1038_01132 | HMPREF1038_01133 | -            | - |
| <i>Streptococcus pneumoniae</i> Hungary19A-6 | -/Xre-Bro                      | SPH_0034         | SPH_0035         | -            | - |
| <i>Streptococcus pneumoniae</i> Hungary19A-6 | -/Xre-COG2856                  | SPH_0072         | SPH_0073         | -            | - |
| <i>Streptococcus pneumoniae</i> Hungary19A-6 | -/Xre-Bro                      | SPH_0075         | SPH_0074         | -            | - |
| <i>Streptococcus pneumoniae</i> Hungary19A-6 | RelBE or parDE/RHH-RelE        | SPH_0392         | SPH_0391         | -            | - |
| <i>Streptococcus pneumoniae</i> Hungary19A-6 | phd-doc/AbrB-Fic               | SPH_0995         | SPH_0994         | -            | - |
| <i>Streptococcus pneumoniae</i> Hungary19A-6 | RelBE or parDE/RHH-RelE        | SPH_1337         | SPH_1338         | -            | - |
| <i>Streptococcus pneumoniae</i> Hungary19A-6 | relBE or parDE/PHD-RelE        | SPH_1849         | SPH_1850         | -            | - |
| <i>Streptococcus pneumoniae</i> Hungary19A-6 | hicBA/HicB-HicA                | SPH_1904         | SPH_1903         | -            | - |
| <i>Streptococcus pneumoniae</i> Hungary19A-6 | -/Xre-COG2856                  | SPH_2084         | SPH_2086         | -            | - |

|                                        |                              |             |             |   |   |
|----------------------------------------|------------------------------|-------------|-------------|---|---|
| <i>Streptococcus pneumoniae</i> R6     | relBE/RHH-RelE               | spr0253     | spr0252     | - | - |
| <i>Streptococcus pneumoniae</i> R6     | relBE/RHH-RelE               | spr1103     | spr1104     | - | - |
| <i>Streptococcus pneumoniae</i> R6     | relBE/PHD-RelE               | spr1585     | spr1586     | - | - |
| <i>Streptococcus pneumoniae</i> R6     | hicBA/HicB-HicA              | spr1613     | spr1612     | - | - |
| <i>Streptococcus pneumoniae</i> R6     | -/Xre-COG2856                | spr1752     | spr1753     | - | - |
| <i>Streptococcus pneumoniae</i> TIGR4  | relBE/RHH-RelE               | SP_0276     | SP_0275     | - | - |
| <i>Streptococcus pneumoniae</i> TIGR4  | phd-doc/AbrB-Fic             | SP_0889     | SP_0888     | - | - |
| <i>Streptococcus pneumoniae</i> TIGR4  | higBA/Xre-RelE               | SP_1143     | SP_1144     | - | - |
| <i>Streptococcus pneumoniae</i> TIGR4  | relBE/RHH-RelE               | SP_1223     | SP_1224     | - | - |
| <i>Streptococcus pneumoniae</i> TIGR4  | relBE/PHD-RelE               | SP_1740     | SP_1741     | - | - |
| <i>Streptococcus pneumoniae</i> TIGR4  | hicBA/HicB-HicA              | SP_1787     | SP_1786     | - | - |
| <i>Streptococcus pneumoniae</i> TIGR4  | -/Xre-COG2856                | SP_1935     | SP_1936     | - | - |
| <i>Enterococcus faecalis</i> (plasmid) | -/-                          | pJHW9-2_006 | pJHW9-2_005 | - | - |
| <i>Enterococcus faecalis</i> V583      | -/Xre-COG2856                | EF0128      | EF0129      | - | - |
| <i>Enterococcus faecalis</i> V583      | -/HEPN-MNT                   | EF0137      | EF0138      | - | - |
| <i>Enterococcus faecalis</i> V583      | -/Xre-COG2856                | EF0305      | EF0306      | - | - |
| <i>Enterococcus faecalis</i> V583      | phd-doc/AbrB-Fic             | EF0379      | EF0380      | - | - |
| <i>Enterococcus faecalis</i> V583      | relBE/RHH-RelE               | EF0513      | EF0512      | - | - |
| <i>Enterococcus faecalis</i> V583      | -/Xre-COG2856                | EF1276      | EF1277      | - | - |
| <i>Enterococcus faecalis</i> V583      | -/Xre-COG2856                | EF1421      | EF1422      | - | - |
| <i>Enterococcus faecalis</i> V583      | -/Xre-COG2856                | EF2041      | EF2040      | - | - |
| <i>Enterococcus faecalis</i> V583      | -/Xre-COG2856                | EF2143      | EF2142      | - | - |
| <i>Enterococcus faecalis</i> V583      | -/HEPN-MNT                   | EF2535      | EF2534      | - | - |
| <i>Enterococcus faecalis</i> V583      | -/Xre-COG2856                | EF2545      | EF2544      | - | - |
| <i>Enterococcus faecalis</i> V583      | -/Xre-COG2856                | EF2853      | EF2852      | - | - |
| <i>Enterococcus faecalis</i> V583      | mazEF/AbrB-MazF              | EF3262      | EF3261      | - | - |
| <i>Enterococcus faecalis</i> V583      | RelBE or parDE/RHH-RelE      | EFA0066     | EFA0065     | - | - |
| <i>Enterococcus faecalis</i> V583      | mazEF/AbrB-MazF              | EFA0071     | EFA0072     | - | - |
| <i>Staphylococcus aureus</i> (plasmid) | omega-epsilon-zeta/-         | zeta        | epsilon     | - | o |
| <i>Staphylococcus aureus</i> (plasmid) | mazEF/AbrB-MazF              | SACH_a18    | SACH_a19    | - | o |
| <i>Staphylococcus aureus</i> RF122     | -/Xre-Bro                    | SAB1755c    | SAB1756c    | - | - |
| <i>Staphylococcus aureus</i> RF122     | mazEF, ccd or relBE/RHH-MazF | SAB1953c    | SAB1954c    | - | - |
| <i>Staphylococcus aureus</i> RF122     | relBE or parDE/PHD-RelE      | SAB2287c    | SAB2288c    | - | - |

|                                                                   |                                 |                   |                   |   |   |
|-------------------------------------------------------------------|---------------------------------|-------------------|-------------------|---|---|
| <i>Staphylococcus aureus</i><br>RF122                             | relBE or parDE/PHD-<br>RelE     | SAB2339c          | SAB2340c          | - | - |
| <i>Staphylococcus aureus</i><br>subsp. <i>aureus</i> COL          | -/Xre-COG2856                   | SACOL0889         | SACOL0890         | - | - |
| <i>Staphylococcus aureus</i><br>subsp. <i>aureus</i> COL          | mazEF/RHH-MazF                  | SACOL2058         | SACOL2059         | - | - |
| <i>Staphylococcus aureus</i><br>subsp. <i>aureus</i> COL          | relBE/PHD-RelE                  | SACOL2404         | SACOL2405         | - | - |
| <i>Staphylococcus aureus</i><br>subsp. <i>aureus</i> COL          | relBE/PHD-RelE                  | SACOL2464         | SACOL2465         | - | - |
| <i>Staphylococcus aureus</i><br>subsp. <i>aureus</i><br>MRSA252   | -/Xre-COG2856                   | SAR1557           | SAR1556           | - | - |
| <i>Staphylococcus aureus</i><br>subsp. <i>aureus</i><br>MRSA252   | mazEF/RHH-MazF                  | SAR2156           | SAR2157           | - | - |
| <i>Staphylococcus aureus</i><br>subsp. <i>aureus</i><br>MRSA252   | relBE/PHD-RelE                  | SAR2497           | SAR2498           | - | - |
| <i>Staphylococcus aureus</i><br>subsp. <i>aureus</i><br>MSSA476   | -/Xre-COG2856                   | SAS0896           | SAS0897           | - | - |
| <i>Staphylococcus aureus</i><br>subsp. <i>aureus</i><br>MSSA476   | mazEF/RHH-MazF                  | SAS1973           | SAS1974           | - | - |
| <i>Staphylococcus aureus</i><br>subsp. <i>aureus</i><br>MSSA476   | relBE/PHD-RelE                  | SAS2298           | SAS2299           | - | - |
| <i>Staphylococcus aureus</i><br>subsp. <i>aureus</i><br>MSSA476   | relBE/PHD-RelE                  | SAS2348           | SAS2349           | - | - |
| <i>Staphylococcus aureus</i><br>subsp. <i>aureus</i> Mu3          | -/Xre-COG2856                   | SAHV_0846         | SAHV_0847         | - | - |
| <i>Staphylococcus aureus</i><br>subsp. <i>aureus</i> Mu3          | mazEF, ccd or<br>relBE/RHH-MazF | SAHV_2053         | SAHV_2054         | - | - |
| <i>Staphylococcus aureus</i><br>subsp. <i>aureus</i> Mu3          | relBE or parDE/PHD-<br>RelE     | SAHV_2391         | SAHV_2392         | - | - |
| <i>Staphylococcus aureus</i><br>subsp. <i>aureus</i> Mu3          | relBE or parDE/PHD-<br>RelE     | SAHV_2440         | SAHV_2441         | - | - |
| <i>Staphylococcus aureus</i><br>subsp. <i>aureus</i> Mu50         | -/Xre-COG2856                   | SAV0850           | SAV0851           | - | - |
| <i>Staphylococcus aureus</i><br>subsp. <i>aureus</i> Mu50         | mazEF/RHH-MazF                  | SAV2068           | SAV2069           | - | - |
| <i>Staphylococcus aureus</i><br>subsp. <i>aureus</i> Mu50         | relBE/PHD-RelE                  | SAV2407           | SAV2408           | - | - |
| <i>Staphylococcus aureus</i><br>subsp. <i>aureus</i> Mu50         | relBE/PHD-RelE                  | SAV2456           | SAV2457           | - | - |
| <i>Staphylococcus aureus</i><br>subsp. <i>aureus</i> MW2          | -/Xre-COG2856                   | MW1437            | MW1436            | - | - |
| <i>Staphylococcus aureus</i><br>subsp. <i>aureus</i> MW2          | mazEF/RHH-MazF                  | MW1992            | MW1993            | - | - |
| <i>Staphylococcus aureus</i><br>subsp. <i>aureus</i> MW2          | relBE/PHD-RelE                  | MW2329            | MW2330            | - | - |
| <i>Staphylococcus aureus</i><br>subsp. <i>aureus</i> MW2          | relBE/PHD-RelE                  | MW2380            | MW2381            | - | - |
| <i>Staphylococcus aureus</i><br>subsp. <i>aureus</i> N315         | mazEF/RHH-MazF                  | SA1873            | SAS067            | - | - |
| <i>Staphylococcus aureus</i><br>subsp. <i>aureus</i> N315         | relBE/PHD-RelE                  | SA2195            | SA2196            | - | - |
| <i>Staphylococcus aureus</i><br>subsp. <i>aureus</i> N315         | relBE/PHD-RelE                  | SA2245            | SA2246            | - | - |
| <i>Staphylococcus aureus</i><br>subsp. <i>aureus</i> NCTC<br>8325 | mazEF, ccd or<br>relBE/RHH-MazF | SAOUHSC_02<br>303 | SAOUHSC_02<br>304 | - | - |

|                                                                        |                                 |                    |                    |   |   |
|------------------------------------------------------------------------|---------------------------------|--------------------|--------------------|---|---|
| <i>Staphylococcus aureus</i><br>subsp. <i>aureus</i> NCTC<br>8325      | relBE or parDE/PHD-<br>RelE     | SAOUHSC_02<br>691  | SAOUHSC_02<br>692  | - | - |
| <i>Staphylococcus aureus</i><br>subsp. <i>aureus</i> NCTC<br>8325      | relBE or parDE/PHD-<br>RelE     | SAOUHSC_02<br>756  | SAOUHSC_02<br>757  | - | - |
| <i>Staphylococcus aureus</i><br>subsp. <i>aureus</i> str.<br>Newman    | -/Xre-COG2856                   | NWMN_0265          | NWMN_0266          | - | - |
| <i>Staphylococcus aureus</i><br>subsp. <i>aureus</i><br>USA300 TCH1516 | -/Xre-COG2856                   | USA300HOU_<br>0853 | USA300HOU_<br>0854 | - | - |
| <i>Staphylococcus aureus</i><br>subsp. <i>aureus</i><br>USA300 TCH1516 | -/Xre-COG2856                   | USA300HOU_<br>1487 | USA300HOU_<br>1486 | - | - |
| <i>Staphylococcus aureus</i><br>subsp. <i>aureus</i><br>USA300 TCH1516 | mazEF, ccd or<br>relBE/RHH-MazF | USA300HOU_<br>2063 | USA300HOU_<br>2064 | - | - |
| <i>Staphylococcus aureus</i><br>subsp. <i>aureus</i><br>USA300 TCH1516 | relBE or parDE/PHD-<br>RelE     | USA300HOU_<br>2387 | USA300HOU_<br>2388 | - | - |
| <i>Staphylococcus aureus</i><br>subsp. <i>aureus</i><br>USA300 TCH1516 | relBE or parDE/PHD-<br>RelE     | USA300HOU_<br>2446 | USA300HOU_<br>2447 | - | - |
| <i>Neisseria gonorrhoeae</i><br>FA 1090                                | mazEF/AbrB-MazF                 | NGO0516            | NGO0517            | - | - |
| <i>Neisseria gonorrhoeae</i><br>FA 1090                                | vapBC/RHH-PIN                   | NGO0907            | NGO0908            | - | - |
| <i>Neisseria gonorrhoeae</i><br>FA 1090                                | hicBA/HicB-HicA                 | NGO1628            | NGO1627            | - | - |
| <i>Neisseria gonorrhoeae</i><br>NCCP11945                              | relBE/Xre-RelE                  | NGK_0018           | NGK_0017           | - | - |
| <i>Neisseria gonorrhoeae</i><br>NCCP11945                              | vapBC/RHH-PIN                   | NGK_0895           | NGK_0894           | - | - |
| <i>Neisseria gonorrhoeae</i><br>NCCP11945                              | -/RHH-GNAT                      | NGK_1047           | NGK_1046           | - | - |
| <i>Neisseria gonorrhoeae</i><br>NCCP11945                              | relBE/AbrB-RelE                 | NGK_1059           | NGK_1058           | - | - |
| <i>Neisseria gonorrhoeae</i><br>NCCP11945                              | relBE/Xre-RelE                  | NGK_1160           | NGK_1159           | - | - |
| <i>Neisseria gonorrhoeae</i><br>NCCP11945                              | mazEF/AbrB-MazF                 | NGK_1418           | NGK_1417           | - | - |
| <i>Neisseria gonorrhoeae</i><br>NCCP11945                              | hicBA/HicB-HicA                 | NGK_1459           | NGK_1460           | - | - |
| <i>Rickettsia felis</i><br>URRWXCal2                                   | relBE or parDE/PHD-<br>RelE     | RF_0016            | RF_0015            | - | - |
| <i>Rickettsia felis</i><br>URRWXCal2                                   | vapBC/AbrB-PIN                  | RF_0095            | RF_0094            | - | - |
| <i>Rickettsia felis</i><br>URRWXCal2                                   | -/RHH-COG2929                   | RF_0168            | RF_0169            | - | - |
| <i>Rickettsia felis</i><br>URRWXCal2                                   | hicBA/HicB-HicA                 | RF_0215            | RF_0216            | - | - |
| <i>Rickettsia felis</i><br>URRWXCal2                                   | vapBC/PHD-PIN                   | RF_0271            | RF_0272            | - | - |
| <i>Rickettsia felis</i><br>URRWXCal2                                   | -/RHH-COG2929                   | RF_0312            | RF_0311            | - | - |
| <i>Rickettsia felis</i><br>URRWXCal2                                   | RelBE or parDE/RHH-<br>RelE     | RF_0334            | RF_0335            | - | - |
| <i>Rickettsia felis</i><br>URRWXCal2                                   | -/HEPN-MNT                      | RF_0356            | RF_0357            | - | - |
| <i>Rickettsia felis</i><br>URRWXCal2                                   | vapBC/PHD-PIN                   | RF_0456            | RF_0457            | - | - |
| <i>Rickettsia felis</i><br>URRWXCal2                                   | relBE or parDE/PHD-<br>RelE     | RF_0490            | RF_0489            | - | - |



|                                                   |                                 |             |             |   |   |
|---------------------------------------------------|---------------------------------|-------------|-------------|---|---|
| <i>Rickettsia felis</i><br>URRWXCal2              | relBE or parDE/PHD-<br>RelE     | RF_0602     | RF_0601     | - | - |
| <i>Rickettsia felis</i><br>URRWXCal2              | vapBC/PHD-PIN                   | RF_0701     | RF_0702     | - | - |
| <i>Rickettsia felis</i><br>URRWXCal2              | vapBC/PHD-PIN                   | RF_0732     | RF_0731     | - | - |
| <i>Rickettsia felis</i><br>URRWXCal2              | -/HEPN-MNT                      | RF_0754     | RF_0753     | - | - |
| <i>Rickettsia felis</i><br>URRWXCal2              | relBE or parDE/PHD-<br>RelE     | RF_0787     | RF_0788     | - | - |
| <i>Rickettsia felis</i><br>URRWXCal2              | RelBE or parDE/RHH-<br>RelE     | RF_0898     | RF_0899     | - | - |
| <i>Rickettsia felis</i><br>URRWXCal2              | relBE or parDE/PHD-<br>RelE     | RF_0911     | RF_0910     | - | - |
| <i>Rickettsia felis</i><br>URRWXCal2              | RelBE or parDE/RHH-<br>RelE     | RF_0956     | RF_0957     | - | - |
| <i>Rickettsia felis</i><br>URRWXCal2              | vapBC/AbrB-PIN                  | RF_1206     | RF_1207     | - | - |
| <i>Rickettsia felis</i><br>URRWXCal2              | RelBE or parDE/RHH-<br>RelE     | RF_1272     | RF_1273     | - | - |
| <i>Rickettsia felis</i><br>URRWXCal2              | -/HEPN-MNT                      | RF_1280     | RF_1279     | - | - |
| <i>Rickettsia felis</i><br>URRWXCal2              | relBE/Xre-RelE                  | RF_1286     | RF_1287     | - | - |
| <i>Rickettsia felis</i><br>URRWXCal2              | relBE/Xre-RelE                  | RF_1317     | RF_1316     | - | - |
| <i>Rickettsia felis</i><br>URRWXCal2              | mazEF, ccd or<br>relBE/RHH-MazF | RF_1343     | RF_1342     | - | - |
| <i>Rickettsia felis</i><br>URRWXCal2              | relBE or parDE/PHD-<br>RelE     | RF_1368     | RF_1369     | - | - |
| <i>Shigella flexneri</i> 2a<br>str. 2457T         | -/RHH-GNAT                      | S4812       | S0373       | - | - |
| <i>Shigella flexneri</i> 2a<br>str. 2457T         | relBE/RHH-RelE                  | S1669       | S1670       | - | - |
| <i>Shigella flexneri</i> 2a<br>str. 2457T         | relBE/Xre-RelE                  | S3330       | S3329       | - | - |
| <i>Shigella flexneri</i> 2a<br>str. 2457T         | -/YhfG-Fic                      | S4383       | S4382       | - | - |
| <i>Shigella flexneri</i> 2a<br>str. 301           | -/RHH-GNAT                      | SF0367      | SF0368      | - | - |
| <i>Shigella flexneri</i> 2a<br>str. 301           | relBE/RHH-RelE                  | SF1548      | SF1549      | - | - |
| <i>Shigella flexneri</i> 2a<br>str. 301           | relBE/-                         | SF2076      | SF2079      | - | - |
| <i>Shigella flexneri</i> 2a<br>str. 301           | relBE/Xre-RelE                  | SF3123      | SF3122      | - | - |
| <i>Shigella flexneri</i> 2a<br>str. 301           | -/YhfG-Fic                      | SF3380      | SF3381      | - | - |
| <i>Shigella flexneri</i> 2a<br>str. 301           | mazEF/AbrB-MazF                 | SF3434      | SF3433      | - | - |
| <i>Shigella flexneri</i> 2b                       | parD (pem)/-                    | R100p114    | R100p113    | - | o |
| <i>Shigella flexneri</i> 5a<br>str. M90T          | vapBC/PHD-PIN                   | pWR501_0259 | pWR501_0258 | - | o |
| <i>Shigella flexneri</i> 5 str.<br>8401           | -/RHH-GNAT                      | SFV_0397    | SFV_0398    | - | - |
| <i>Shigella flexneri</i> 5 str.<br>8401           | relBE/Xre-RelE                  | SFV_3124    | SFV_3123    | - | - |
| <i>Shigella flexneri</i> 5 str.<br>8401           | -/YhfG-Fic                      | SFV_3367    | SFV_3368    | - | - |
| <i>Escherichia coli</i><br>O157:H7 str.<br>EDL933 | ccd/RHH-MazF                    | Z0057       | Z0056       | - | o |
| <i>Escherichia coli</i><br>O157:H7 str.<br>EDL933 | RelBE or parDE/RHH-<br>RelE     | Z0284       | Z0285       | - | - |

|                                                   |                                 |           |           |         |   |
|---------------------------------------------------|---------------------------------|-----------|-----------|---------|---|
| <i>Escherichia coli</i><br>O157:H7 str.<br>EDL933 | parDE/RHH-RelE                  | Z0510     | Z0509     | -       | o |
| <i>Escherichia coli</i><br>O157:H7 str.<br>EDL933 | relBE/Xre-RelE                  | Z1060     | Z1059     | -       | - |
| <i>Escherichia coli</i><br>O157:H7 str.<br>EDL933 | higBA/COG5606-RelE              | Z3230     | Z3231     | -       | - |
| <i>Escherichia coli</i><br>O157:H7 str.<br>EDL933 | mazEF/AbrB-MazF                 | Z4097     | Z4098     | -       | - |
| <i>Escherichia coli</i><br>O157:H7 str.<br>EDL933 | relBE/Xre-RelE                  | Z4436     | Z4435     | -       | - |
| <i>Escherichia coli</i><br>O157:H7 str.<br>EDL933 | prfF-yhaV/AbrB-RelE             | Z4482     | Z4481     | -       | - |
| <i>Escherichia coli</i><br>O157:H7 str.<br>EDL933 | -/YhfG-Fic                      | Z4722     | Z4723     | -       | - |
| <i>Escherichia coli</i><br>O157:H7 str.<br>EDL933 | -/RHH-GNAT                      | Z4777     | Z4776     | -       | - |
| <i>Escherichia coli</i><br>O157:H7 str.<br>EDL933 | -/RHH-GNAT                      | Z4832     | Z4833     | -       | - |
| <i>Escherichia coli</i><br>O157:H7 str.<br>EDL933 | hicBA/HicB-HicA                 | Z4883     | Z4882     | -       | - |
| <i>Escherichia coli</i><br>O157:H7 str.<br>EDL933 | relBE/Xre-RelE                  | Z5150     | Z5151     | -       | - |
| <i>Escherichia coli</i><br>O157:H7 str.<br>EDL933 | mazEF/AbrB-MazF                 | Z5836     | Z5835     | -       | - |
| <i>Escherichia coli</i><br>O157:H7 str. Sakai     | -/-                             | pOSAK1_02 | pOSAK1_03 | -       | o |
| <i>Escherichia coli</i><br>O157:H7 str. Sakai     | mazEF, ccd or<br>relBE/RHH-MazF | pO157p29  | pO157p28  | -       | - |
| <i>Escherichia coli</i><br>O157:H7 str. Sakai     | RelBE or parDE/RHH-<br>RelE     | pO157p70  | pO157p69  | -       | - |
| <i>Escherichia coli</i><br>O157:H7 str. Sakai     | ccd/RHH-MazF                    | ECs0053   | ECs0052   | -       | - |
| <i>Escherichia coli</i><br>O157:H7 str. Sakai     | relBE/RHH-RelE                  | ECs0252   | ECs0253   | -       | - |
| <i>Escherichia coli</i><br>O157:H7 str. Sakai     | parDE/RHH-RelE                  | ECs0462   | ECs0461   | -       | - |
| <i>Escherichia coli</i><br>O157:H7 str. Sakai     | relBE/Xre-RelE                  | ECs5400   | ECs5399   | -       | - |
| <i>Escherichia coli</i><br>O157:H7 str. Sakai     | paaR-paaA-parE/RHH-<br>RelE     | ECs1067   | ECs1068   | ECs1069 | o |
| <i>Escherichia coli</i><br>O157:H7 str. Sakai     | paaR-paaA-parE/RHH-<br>RelE     | ECs2281   | ECs2280   | ECs2279 | o |
| <i>Escherichia coli</i><br>O157:H7 str. Sakai     | higBA/COG5606-RelE              | ECs2869   | ECs2870   | -       | - |
| <i>Escherichia coli</i><br>O157:H7 str. Sakai     | mazEF/AbrB-MazF                 | ECs3642   | ECs3643   | -       | - |
| <i>Escherichia coli</i><br>O157:H7 str. Sakai     | relBE/Xre-RelE                  | ECs3965   | ECs3964   | -       | - |
| <i>Escherichia coli</i><br>O157:H7 str. Sakai     | prfF-yhaV/AbrB-RelE             | ECs4008   | ECs4007   | -       | - |
| <i>Escherichia coli</i><br>O157:H7 str. Sakai     | -/YhfG-Fic                      | ECs4212   | ECs4213   | -       | - |
| <i>Escherichia coli</i><br>O157:H7 str. Sakai     | -/RHH-GNAT                      | ECs4262   | ECs4261   | -       | - |

|                                                           |                      |             |             |   |   |
|-----------------------------------------------------------|----------------------|-------------|-------------|---|---|
| <i>Escherichia coli</i><br>O157:H7 str. Sakai             | -/RHH-GNAT           | ECs4307     | ECs4308     | - | - |
| <i>Escherichia coli</i><br>O157:H7 str. Sakai             | hicBA/HicB-HicA      | ECs4357     | ECs4356     | - | - |
| <i>Escherichia coli</i><br>O157:H7 str. Sakai             | relBE/Xre-RelE       | ECs4597     | ECs4598     | - | - |
| <i>Escherichia coli</i><br>O157:H7 str. Sakai             | mazEF/AbrB-MazF      | ECs5203     | ECs5202     | - | - |
| <i>Vibrio fischeri</i> ES114                              | hipBA/Xre-HipA       | VF_1470     | VF_1469     | - | - |
| <i>Vibrio fischeri</i> MJ11                               | relBE/Xre-RelE       | VFMJ11_1428 | VFMJ11_1427 | - | - |
| <i>Vibrio fischeri</i> MJ11                               | hipBA/Xre-HipA       | VFMJ11_1565 | VFMJ11_1564 | - | - |
| <i>Vibrio fischeri</i> MJ11                               | hipBA/Xre-HipA       | VFMJ11_2144 | VFMJ11_2145 | - | - |
| <i>Vibrio cholerae</i> MJ-1236                            | mosAT/-              | VCD_003702  | VCD_003703  | - | o |
| <i>Vibrio cholerae</i> O1<br>biovar El Tor str.<br>N16961 | parDE/PHD-RelE       | VCA0311     | VCA0312     | - | o |
| <i>Vibrio cholerae</i> O1<br>biovar El Tor str.<br>N16961 | -/RHH-GNAT           | VCA0318     | VCA0319     | - | - |
| <i>Vibrio cholerae</i> O1<br>biovar El Tor str.<br>N16961 | relBE/RHH-RelE       | VCA0323     | VCA0324     | - | - |
| <i>Vibrio cholerae</i> O1<br>biovar El Tor str.<br>N16961 | -/RHH-COG2929        | VCA0332     | VCA0333     | - | - |
| <i>Vibrio cholerae</i> O1<br>biovar El Tor str.<br>N16961 | -/RHH-COG2929(toxin) | VCA0348     |             | - | - |
| <i>Vibrio cholerae</i> O1<br>biovar El Tor str.<br>N16961 | parDE/-              | VCA0359     | VCA0360     | - | o |
| <i>Vibrio cholerae</i> O1<br>biovar El Tor str.<br>N16961 | parDE/PHD-RelE       | VCA0385     | VCA0386     | - | o |
| <i>Vibrio cholerae</i> O1<br>biovar El Tor str.<br>N16961 | higBA/Xre-RelE       | VCA0391     | VCA0392     | - | o |
| <i>Vibrio cholerae</i> O1<br>biovar El Tor str.<br>N16961 | relBE/PHD-RelE       | VCA0423     | VCA0422     | - | - |
| <i>Vibrio cholerae</i> O1<br>biovar El Tor str.<br>N16961 | relBE/PHD-RelE       | VCA0444     | VCA0445     | - | - |
| <i>Vibrio cholerae</i> O1<br>biovar El Tor str.<br>N16961 | higBA/Xre-RelE       | VCA0468     | VCA0469     | - | o |
| <i>Vibrio cholerae</i> O1<br>biovar El Tor str.<br>N16961 | relBE/PHD-RelE       | VCA0478     | VCA0477     | - | - |
| <i>Vibrio cholerae</i> O1<br>biovar El Tor str.<br>N16961 | -/RHH-GNAT           | VCA0481     | VCA0482     | - | - |
| <i>Vibrio cholerae</i> O1<br>biovar El Tor str.<br>N16961 | -/RHH-GNAT(toxin)    | VCA0487     |             | - | - |
| <i>Vibrio cholerae</i> O1<br>biovar El Tor str.<br>N16961 | relBE/PHD-RelE       | VCA0489     | VCA0488     | - | - |
| <i>Vibrio cholerae</i> O1<br>biovar El Tor str.<br>N16961 | -/PHD-RelE(toxin)    | VCA0503     |             | - | - |

|                                             |                           |              |              |   |   |
|---------------------------------------------|---------------------------|--------------|--------------|---|---|
| <i>Vibrio cholerae</i> O395                 | RelBE or parDE/RHH-RelE   | VC0395_0757  | VC0395_0756  | - | - |
| <i>Vibrio cholerae</i> O395                 | -/RHH-GNAT                | VC0395_0759  | VC0395_0760  | - | - |
| <i>Vibrio cholerae</i> O395                 | -/RHH-GNAT                | VC0395_0765  | VC0395_0764  | - | - |
| <i>Vibrio cholerae</i> O395                 | relBE or parDE/PHD-RelE   | VC0395_0794  | VC0395_0795  | - | - |
| <i>Vibrio cholerae</i> O395                 | relBE/Xre-RelE            | VC0395_0804  | VC0395_0803  | - | - |
| <i>Vibrio cholerae</i> O395                 | relBE or parDE/PHD-RelE   | VC0395_0823  | VC0395_0822  | - | - |
| <i>Vibrio cholerae</i> O395                 | relBE or parDE/PHD-RelE   | VC0395_0849  | VC0395_0850  | - | - |
| <i>Vibrio cholerae</i> O395                 | relBE or parDE/PHD-RelE   | VC0395_0861  | VC0395_0862  | - | - |
| <i>Vibrio cholerae</i> O395                 | -/RHH-GNAT                | VC0395_0916  | VC0395_0915  | - | - |
| <i>Vibrio cholerae</i> O395                 | relBE/Xre-RelE            | VC0395_0930  | VC0395_0929  | - | - |
| <i>Vibrio cholerae</i> O395                 | relBE or parDE/PHD-RelE   | VC0395_0937  | VC0395_0936  | - | - |
| <i>Vibrio cholerae</i> O395                 | hipBA/Xre-HipA            | VC0395_A0340 | VC0395_A0339 | - | - |
| <i>Vibrio parahaemolyticus</i> RIMD 2210633 | hipBA/Xre-HipA            | VP0402       | VP0403       | - | - |
| <i>Vibrio parahaemolyticus</i> RIMD 2210633 | relBE/PHD-RelE            | VP1820       | VP1821       | - | - |
| <i>Vibrio parahaemolyticus</i> RIMD 2210633 | relBE/RHH-RelE            | VP1830       | VP1829       | - | - |
| <i>Vibrio parahaemolyticus</i> RIMD 2210633 | RelBE or parDE/RHH-RelE   | VP1843       | VP1842       | - | - |
| <i>Vibrio parahaemolyticus</i> RIMD 2210633 | RelBE or parDE/RHH-RelE   | VP1843       | VP1842       | - | o |
| <i>Vibrio parahaemolyticus</i> RIMD 2210633 | parDE/RHH-RelE(antitoxin) | VP1884       | VP1885       | - | - |
| <i>Vibrio parahaemolyticus</i> RIMD 2210633 | parDE/PHD-RelE            | VP1885       | VP1886       | - | - |
| <i>Vibrio vulnificus</i> CMCP6              | RelBE or parDE/RHH-RelE   | VV1_0110     | VV1_0111     | - | - |
| <i>Vibrio vulnificus</i> CMCP6              | hipBA/Xre-HipA            | VV1_0401     | VV1_0402     | - | - |
| <i>Vibrio vulnificus</i> CMCP6              | hipBA/Xre-HipA            | VV1_2047     | VV1_2046     | - | - |
| <i>Vibrio vulnificus</i> CMCP6              | hipBA/Xre-HipA            | VV1_2190     | VV1_2191     | - | - |
| <i>Vibrio vulnificus</i> CMCP6              | relBE/PHD-RelE            | VV1_2410     | VV1_2409     | - | - |
| <i>Vibrio vulnificus</i> CMCP6              | relBE/PHD-RelE            | VV1_2433     | VV1_2432     | - | - |
| <i>Vibrio vulnificus</i> CMCP6              | parDE/RHH-RelE            | VV1_2525     | VV1_2526     | - | - |
| <i>Vibrio vulnificus</i> CMCP6              | -/RHH-GNAT                | VV1_2537     | VV1_2538     | - | - |
| <i>Vibrio vulnificus</i> CMCP6              | relBE/PHD-RelE            | VV1_2547     | VV1_2546     | - | - |
| <i>Vibrio vulnificus</i> YJ016              | hicBA/HicB-HicA           | VVP65        | VVP66        | - | - |
| <i>Vibrio vulnificus</i> YJ016              | relBE/RHH-RelE            | VVA0314      | VVA0313      | - | - |

|                                                                                       |                         |                |                |   |   |
|---------------------------------------------------------------------------------------|-------------------------|----------------|----------------|---|---|
| <i>Brucella abortus</i> bv. 1 str. 9-941                                              | -/Xre-COG2856           | BruAb1_0264    | BruAb1_0263    | - | - |
| <i>Brucella abortus</i> bv. 1 str. 9-941                                              | RelBE or parDE/RHH-RelE | BruAb1_0430    | BruAb1_0431    | - | - |
| <i>Brucella abortus</i> bv. 1 str. 9-941                                              | phd-doc/AbrB-Fic        | BruAb1_0579    | BruAb1_0580    | - | - |
| <i>Brucella abortus</i> bv. 1 str. 9-941                                              | -/RHH-COG2929           | BruAb1_0981    | BruAb1_0980    | - | - |
| <i>Brucella abortus</i> S19                                                           | -/COG5642-COG5654       | BAbS19_II08620 | BAbS19_II08610 | - | - |
| <i>Salmonella enterica</i> subsp. <i>enterica</i> serovar <i>Typhimurium</i> str. LT2 | relBE/PHD-RelE          | STM1550        | STM1551        | - | - |
| <i>Salmonella enterica</i> subsp. <i>enterica</i> serovar <i>Typhimurium</i> str. LT2 | -/RHH-GNAT              | STM2905        | STM2904        | - | - |
| <i>Salmonella enterica</i> subsp. <i>enterica</i> serovar <i>Typhimurium</i> str. LT2 | RelBE or parDE/RHH-RelE | STM2954.1n     | STM2955.S      | - | - |
| <i>Salmonella enterica</i> subsp. <i>enterica</i> serovar <i>Typhimurium</i> str. LT2 | vapBC/AbrB-PIN          | STM3033        | STM3034        | - | o |
| <i>Salmonella enterica</i> subsp. <i>enterica</i> serovar <i>Typhimurium</i> str. LT2 | -/YhfG-Fic              | STM3470        | STM3471        | - | - |
| <i>Salmonella enterica</i> subsp. <i>enterica</i> serovar <i>Typhimurium</i> str. LT2 | relBE/RHH-RelE          | STM3516        | STM3517        | - | - |
| <i>Salmonella enterica</i> subsp. <i>enterica</i> serovar <i>Typhimurium</i> str. LT2 | phd-doc/PHD-Fic         | STM3558        | STM3559        | - | o |
| <i>Salmonella enterica</i> subsp. <i>enterica</i> serovar <i>Typhimurium</i> str. LT2 | -/RHH-GNAT              | STM3651        | STM3652        | - | - |
| <i>Salmonella enterica</i> subsp. <i>enterica</i> serovar <i>Typhimurium</i> str. LT2 | relBE/Xre-RelE          | STM3777        | STM3778        | - | - |
| <i>Salmonella enterica</i> subsp. <i>enterica</i> serovar <i>Typhimurium</i> str. LT2 | higBA/COG5606-RelE      | STM3906        | STM3907        | - | - |
| <i>Salmonella enterica</i> subsp. <i>enterica</i> serovar <i>Typhimurium</i> str. LT2 | relBE/Xre-RelE          | STM4031        | STM4030.S      | - | - |
| <i>Salmonella enterica</i> subsp. <i>enterica</i> serovar <i>Typhimurium</i> str. LT2 | relBE/Xre-RelE          | STM4031        | STM4030.S      | - | o |
| <i>Salmonella enterica</i> subsp. <i>enterica</i> serovar <i>Typhimurium</i> str. LT2 | relBE/Xre-RelE          | STM4032.2N     | STM4033        | - | o |
| <i>Salmonella enterica</i> subsp. <i>enterica</i> serovar <i>Typhimurium</i> str. LT2 | relBE/Xre-RelE          | STM4032.2N     | STM4033        | - | - |

|                                                                                                |                    |         |         |   |   |
|------------------------------------------------------------------------------------------------|--------------------|---------|---------|---|---|
| <i>Salmonella enterica</i><br>subsp. <i>enterica</i><br>serovar <i>Typhimurium</i><br>str. LT2 | -/RHH-GNAT         | STM4318 | STM4317 | - | - |
| <i>Salmonella enterica</i><br>subsp. <i>enterica</i><br>serovar <i>Typhimurium</i><br>str. LT2 | relBE/RHH-RelE     | STM4450 | STM4449 | - | - |
| <i>Salmonella enterica</i><br>subsp. <i>enterica</i><br>serovar <i>Typhimurium</i><br>str. LT2 | -/RHH-COG2929      | STM4528 | STM4529 | - | - |
| <i>Salmonella enterica</i><br>subsp. <i>enterica</i><br>serovar <i>Typhimurium</i><br>str. LT2 | -/RHH-COG2929      | STM4528 | STM4529 | - | o |
| <i>Salmonella enterica</i><br>subsp. <i>enterica</i><br>serovar <i>Typhi</i> str.<br>CT18      | phd-doc/-          | STY1031 |         | - | - |
| <i>Salmonella enterica</i><br>subsp. <i>enterica</i><br>serovar <i>Typhi</i> str.<br>CT18      | -/RHH-GNAT         | STY3027 | STY3026 | - | - |
| <i>Salmonella enterica</i><br>subsp. <i>enterica</i><br>serovar <i>Typhi</i> str.<br>CT18      | vapBC/AbrB-PIN     | STY3182 | STY3183 | - | - |
| <i>Salmonella enterica</i><br>subsp. <i>enterica</i><br>serovar <i>Typhi</i> str.<br>CT18      | higBA/COG5606-RelE | STY3651 | STY3650 | - | - |
| <i>Salmonella enterica</i><br>subsp. <i>enterica</i><br>serovar <i>Typhi</i> str.<br>CT18      | vapBC/RHH-PIN      | STY3844 | STY3845 | - | - |
| <i>Salmonella enterica</i><br>subsp. <i>enterica</i><br>serovar <i>Typhi</i> str.<br>CT18      | relBE/Xre-RelE     | STY3847 | STY3848 | - | - |
| <i>Salmonella enterica</i><br>subsp. <i>enterica</i><br>serovar <i>Typhi</i> str.<br>CT18      | -/RHH-GNAT         | STY4151 | STY4150 | - | - |
| <i>Salmonella enterica</i><br>subsp. <i>enterica</i><br>serovar <i>Typhi</i> str.<br>CT18      | -/YhfG-Fic         | STY4326 | STY4325 | - | - |
| <i>Salmonella enterica</i><br>subsp. <i>enterica</i><br>serovar <i>Typhi</i> str.<br>CT18      | -/RHH-GNAT         | STY4518 | STY4517 | - | - |
| <i>Salmonella enterica</i><br>subsp. <i>enterica</i><br>serovar <i>Typhi</i> str.<br>CT18      | -/RHH-GNAT         | STY4668 | STY4667 | - | - |
| <i>Salmonella enterica</i><br>subsp. <i>enterica</i><br>serovar <i>Typhi</i> str.<br>CT18      | relBE/RHH-RelE     | STY4789 | STY4788 | - | - |
| <i>Salmonella enterica</i><br>subsp. <i>enterica</i><br>serovar <i>Typhi</i> str.<br>CT18      | -/RHH-COG2929      | STY4886 | STY4887 | - | - |

---

|                                                                                       |                    |        |          |   |   |
|---------------------------------------------------------------------------------------|--------------------|--------|----------|---|---|
| <i>Salmonella enterica</i><br>subsp. <i>enterica</i><br>serovar <i>Typhi</i> str. Ty2 | phd-doc/-          | t1909  | t1910    | - | - |
| <i>Salmonella enterica</i><br>subsp. <i>enterica</i><br>serovar <i>Typhi</i> str. Ty2 | -/RHH-GNAT         | t2805  | t2804    | - | - |
| <i>Salmonella enterica</i><br>subsp. <i>enterica</i><br>serovar <i>Typhi</i> str. Ty2 | vapBC/AbrB-PIN     | t2943  | t2944    | - | - |
| <i>Salmonella enterica</i><br>subsp. <i>enterica</i><br>serovar <i>Typhi</i> str. Ty2 | higBA/COG5606-RelE | t3392  | t3391    | - | - |
| <i>Salmonella enterica</i><br>subsp. <i>enterica</i><br>serovar <i>Typhi</i> str. Ty2 | vapBC/RHH-PIN      | t3587  | t3588    | - | - |
| <i>Salmonella enterica</i><br>subsp. <i>enterica</i><br>serovar <i>Typhi</i> str. Ty2 | relBE/Xre-RelE     | t3590  | t3591    | - | - |
| <i>Salmonella enterica</i><br>subsp. <i>enterica</i><br>serovar <i>Typhi</i> str. Ty2 | -/RHH-GNAT         | t3868  | t3867    | - | - |
| <i>Salmonella enterica</i><br>subsp. <i>enterica</i><br>serovar <i>Typhi</i> str. Ty2 | -/YhfG-Fic         | t4035  | t4034    | - | - |
| <i>Salmonella enterica</i><br>subsp. <i>enterica</i><br>serovar <i>Typhi</i> str. Ty2 | -/RHH-GNAT         | t4224  | t4223    | - | - |
| <i>Salmonella enterica</i><br>subsp. <i>enterica</i><br>serovar <i>Typhi</i> str. Ty2 | -/RHH-GNAT         | t4359  | t4358    | - | - |
| <i>Salmonella enterica</i><br>subsp. <i>enterica</i><br>serovar <i>Typhi</i> str. Ty2 | relBE/RHH-RelE     | t4484  | t4483    | - | - |
| <i>Salmonella enterica</i><br>subsp. <i>enterica</i><br>serovar <i>Typhi</i> str. Ty2 | -/RHH-COG2929      | t4578  | t4579    | - | - |
| <i>Mycobacterium tuberculosis</i><br>CDC1551                                          | vapBC/RHH-PIN      | MT0254 | MT0253   | - | - |
| <i>Mycobacterium tuberculosis</i><br>CDC1551                                          | vapBC/RHH-PIN      | MT0289 | MT0290   | - | - |
| <i>Mycobacterium tuberculosis</i><br>CDC1551                                          | vapBC/RHH-PIN      | MT0574 | MT0575   | - | - |
| <i>Mycobacterium tuberculosis</i><br>CDC1551                                          | vapBC/PHD-PIN      | MT0625 | MT0626   | - | - |
| <i>Mycobacterium tuberculosis</i><br>CDC1551                                          | vapBC/AbrB-PIN     | MT0628 | MT0629   | - | - |
| <i>Mycobacterium tuberculosis</i><br>CDC1551                                          | vapBC/RHH-PIN      | MT0638 | MT0637   | - | - |
| <i>Mycobacterium tuberculosis</i><br>CDC1551                                          | vapBC/RHH-PIN      | MT0646 | MT0645.2 | - | - |
| <i>Mycobacterium tuberculosis</i><br>CDC1551                                          | vapBC/RHH-PIN      | MT0652 | MT0651   | - | - |
| <i>Mycobacterium tuberculosis</i><br>CDC1551                                          | vapBC/RHH-PIN      | MT0685 | MT0686   | - | - |
| <i>Mycobacterium tuberculosis</i><br>CDC1551                                          | mazEF/RHH-MazF     | MT0688 | MT0689   | - | - |

|                                              |                   |        |          |   |   |
|----------------------------------------------|-------------------|--------|----------|---|---|
| <i>Mycobacterium tuberculosis</i><br>CDC1551 | vapBC/RHH-PIN     | MT0690 | MT0691   | - | - |
| <i>Mycobacterium tuberculosis</i><br>CDC1551 | vapBC/PHD-PIN     | MT0693 | MT0692.1 | - | - |
| <i>Mycobacterium tuberculosis</i><br>CDC1551 | vapBC/RHH-PIN     | MT0773 | MT0772.6 | - | - |
| <i>Mycobacterium tuberculosis</i><br>CDC1551 | -/RHH-GNAT        | MT0945 | MT0944   | - | - |
| <i>Mycobacterium tuberculosis</i><br>CDC1551 | vapBC/-           | MT0988 | MT0987   | - | - |
| <i>Mycobacterium tuberculosis</i><br>CDC1551 | mazEF/-           | MT1134 | MT1135   | - | - |
| <i>Mycobacterium tuberculosis</i><br>CDC1551 | vapBC/RHH-PIN     | MT1144 | MT1143.1 | - | - |
| <i>Mycobacterium tuberculosis</i><br>CDC1551 | vapBC/RHH-PIN     | MT1280 | MT1279   | - | - |
| <i>Mycobacterium tuberculosis</i><br>CDC1551 | vapBC/RHH-PIN     | MT1441 | MT1442   | - | - |
| <i>Mycobacterium tuberculosis</i><br>CDC1551 | mazEF/-           | MT1542 | MT1541   | - | - |
| <i>Mycobacterium tuberculosis</i><br>CDC1551 | vapBC/RHH-PIN     | MT1612 | MT1611   | - | - |
| <i>Mycobacterium tuberculosis</i><br>CDC1551 | vapBC/RHH-PIN     | MT1761 | MT1762   | - | - |
| <i>Mycobacterium tuberculosis</i><br>CDC1551 | vapBC/RHH-PIN     | MT1783 | MT1782   | - | - |
| <i>Mycobacterium tuberculosis</i><br>CDC1551 | vapBC/RHH-PIN     | MT1886 | MT1887   | - | - |
| <i>Mycobacterium tuberculosis</i><br>CDC1551 | vapBC/RHH-PIN     | MT2003 | MT2002   | - | - |
| <i>Mycobacterium tuberculosis</i><br>CDC1551 | relBE/Xre-RelE    | MT2004 | MT2005   | - | - |
| <i>Mycobacterium tuberculosis</i><br>CDC1551 | parDE/RHH-RelE    | MT2008 | MT2009   | - | - |
| <i>Mycobacterium tuberculosis</i><br>CDC1551 | vapBC/PHD-PIN     | MT2012 | MT2013   | - | - |
| <i>Mycobacterium tuberculosis</i><br>CDC1551 | vapBC/RHH-PIN     | MT2034 | MT2035   | - | - |
| <i>Mycobacterium tuberculosis</i><br>CDC1551 | -/COG5642-COG5654 | MT2043 | MT2044   | - | - |
| <i>Mycobacterium tuberculosis</i><br>CDC1551 | mazEF/RHH-MazF    | MT2046 | MT2047   | - | - |
| <i>Mycobacterium tuberculosis</i><br>CDC1551 | vapBC/RHH-PIN     | MT2065 | MT2064.1 | - | - |

---



|                                              |                                 |        |          |   |   |
|----------------------------------------------|---------------------------------|--------|----------|---|---|
| <i>Mycobacterium tuberculosis</i><br>CDC1551 | -/COG2442-PIN                   | MT2075 | MT2074   | - | - |
| <i>Mycobacterium tuberculosis</i><br>CDC1551 | relBE/Xre-RelE                  | MT2078 | MT2077   | - | - |
| <i>Mycobacterium tuberculosis</i><br>CDC1551 | -/ArsR-COG3832                  | MT2095 | MT2094   | - | - |
| <i>Mycobacterium tuberculosis</i><br>CDC1551 | mazEF, ccd or<br>relBE/RHH-MazF | MT2123 | MT2122   | - | - |
| <i>Mycobacterium tuberculosis</i><br>CDC1551 | vapBC/RHH-PIN                   | MT2163 | MT2164   | - | - |
| <i>Mycobacterium tuberculosis</i><br>CDC1551 | parDE/-                         | MT2200 | MT2201   | - | - |
| <i>Mycobacterium tuberculosis</i><br>CDC1551 | vapBC/RHH-PIN                   | MT2569 | MT2568   | - | - |
| <i>Mycobacterium tuberculosis</i><br>CDC1551 | vapBC/RHH-PIN                   | MT2602 | MT2601.2 | - | - |
| <i>Mycobacterium tuberculosis</i><br>CDC1551 | vapBC/RHH-PIN                   | MT2605 | MT2606   | - | - |
| <i>Mycobacterium tuberculosis</i><br>CDC1551 | vapBC/RHH-PIN                   | MT2622 | MT2621   | - | - |
| <i>Mycobacterium tuberculosis</i><br>CDC1551 | vapBC/RHH-PIN                   | MT2624 | MT2623   | - | - |
| <i>Mycobacterium tuberculosis</i><br>CDC1551 | vapBC/RHH-PIN                   | MT2677 | MT2676   | - | - |
| <i>Mycobacterium tuberculosis</i><br>CDC1551 | mazEF/XF1863-MazF               | MT2722 | MT2721   | - | - |
| <i>Mycobacterium tuberculosis</i><br>CDC1551 | vapBC/RHH-PIN                   | MT2827 | MT2828   | - | - |
| <i>Mycobacterium tuberculosis</i><br>CDC1551 | vapBC/RHH-PIN                   | MT2829 | MT2830   | - | - |
| <i>Mycobacterium tuberculosis</i><br>CDC1551 | vapBC/-                         | MT2932 | MT2931   | - | - |
| <i>Mycobacterium tuberculosis</i><br>CDC1551 | vapBC/PHD-PIN                   | MT3271 | MT3272   | - | - |
| <i>Mycobacterium tuberculosis</i><br>CDC1551 | relBE/Xre-RelE                  | MT3274 | MT3275   | - | - |
| <i>Mycobacterium tuberculosis</i><br>CDC1551 | -/Xre-COG5654                   | MT3277 | MT3276   | - | - |
| <i>Mycobacterium tuberculosis</i><br>CDC1551 | vapBC/RHH-PIN                   | MT3421 | MT3422   | - | - |
| <i>Mycobacterium tuberculosis</i><br>CDC1551 | relBE/PHD-RelE                  | MT3466 | MT3465   | - | - |
| <i>Mycobacterium tuberculosis</i><br>CDC1551 | vapBC/PHD-PIN                   | MT3492 | MT3493   | - | - |

---

|                                           |                              |            |            |   |   |
|-------------------------------------------|------------------------------|------------|------------|---|---|
| <i>Mycobacterium tuberculosis</i> CDC1551 | vapBC/PHD-PIN                | MT3516     | MT3515     | - | - |
| <i>Mycobacterium tuberculosis</i> CDC1551 | vapBC/RHH-PIN                | MT3799     | MT3800     | - | - |
| <i>Mycobacterium tuberculosis</i> CDC1551 | -/MerR-PIN                   | MT3856     | MT3857     | - | - |
| <i>Mycobacterium tuberculosis</i> F11     | vapBC/RHH-PIN                | TBFG_10243 | TBFG_10242 | - | - |
| <i>Mycobacterium tuberculosis</i> F11     | vapBC/RHH-PIN                | TBFG_10281 | TBFG_10282 | - | - |
| <i>Mycobacterium tuberculosis</i> F11     | mazEF, ccd or relBE/RHH-MazF | TBFG_10306 | TBFG_10305 | - | - |
| <i>Mycobacterium tuberculosis</i> F11     | vapBC/RHH-PIN                | TBFG_10593 | TBFG_10592 | - | - |
| <i>Mycobacterium tuberculosis</i> F11     | vapBC/PHD-PIN                | TBFG_10607 | TBFG_10608 | - | - |
| <i>Mycobacterium tuberculosis</i> F11     | vapBC/AbrB-PIN               | TBFG_10610 | TBFG_10611 | - | - |
| <i>Mycobacterium tuberculosis</i> F11     | vapBC/RHH-PIN                | TBFG_10620 | TBFG_10619 | - | - |
| <i>Mycobacterium tuberculosis</i> F11     | vapBC/RHH-PIN                | TBFG_10635 | TBFG_10634 | - | - |
| <i>Mycobacterium tuberculosis</i> F11     | vapBC/PHD-PIN                | TBFG_10638 | TBFG_10637 | - | - |
| <i>Mycobacterium tuberculosis</i> F11     | vapBC/RHH-PIN                | TBFG_10669 | TBFG_10670 | - | - |
| <i>Mycobacterium tuberculosis</i> F11     | mazEF, ccd or relBE/RHH-MazF | TBFG_10672 | TBFG_10673 | - | - |
| <i>Mycobacterium tuberculosis</i> F11     | vapBC/RHH-PIN                | TBFG_10674 | TBFG_10675 | - | - |
| <i>Mycobacterium tuberculosis</i> F11     | vapBC/RHH-PIN                | TBFG_10763 | TBFG_10762 | - | - |
| <i>Mycobacterium tuberculosis</i> F11     | -/RHH-GNAT                   | TBFG_10937 | TBFG_10936 | - | - |
| <i>Mycobacterium tuberculosis</i> F11     | vapBC/RHH-PIN                | TBFG_11136 | TBFG_11135 | - | - |
| <i>Mycobacterium tuberculosis</i> F11     | vapBC/RHH-PIN                | TBFG_11267 | TBFG_11266 | - | - |
| <i>Mycobacterium tuberculosis</i> F11     | relBE or parDE/PHD-RelE      | TBFG_11272 | TBFG_11273 | - | - |
| <i>Mycobacterium tuberculosis</i> F11     | vapBC/RHH-PIN                | TBFG_11426 | TBFG_11427 | - | - |
| <i>Mycobacterium tuberculosis</i> F11     | vapBC/RHH-PIN                | TBFG_11593 | TBFG_11592 | - | - |
| <i>Mycobacterium tuberculosis</i> F11     | vapBC/RHH-PIN                | TBFG_11759 | TBFG_11758 | - | - |
| <i>Mycobacterium tuberculosis</i> F11     | vapBC/RHH-PIN                | TBFG_11982 | TBFG_11981 | - | - |
| <i>Mycobacterium tuberculosis</i> F11     | relBE/Xre-RelE               | TBFG_11983 | TBFG_11984 | - | - |
| <i>Mycobacterium tuberculosis</i> F11     | RelBE or parDE/RHH-RelE      | TBFG_11987 | TBFG_11988 | - | - |
| <i>Mycobacterium tuberculosis</i> F11     | vapBC/PHD-PIN                | TBFG_11990 | TBFG_11991 | - | - |
| <i>Mycobacterium tuberculosis</i> F11     | -/COG5642-COG5654            | TBFG_12020 | TBFG_12021 | - | - |
| <i>Mycobacterium tuberculosis</i> F11     | vapBC/RHH-PIN                | TBFG_12042 | TBFG_12041 | - | - |
| <i>Mycobacterium tuberculosis</i> F11     | -/COG2442-PIN                | TBFG_12054 | TBFG_12053 | - | - |
| <i>Mycobacterium tuberculosis</i> F11     | relBE/Xre-RelE               | TBFG_12057 | TBFG_12056 | - | - |

|                                         |                              |            |            |   |   |
|-----------------------------------------|------------------------------|------------|------------|---|---|
| <i>Mycobacterium tuberculosis</i> F11   | -/ArsR-COG3832               | TBFG_12072 | TBFG_12071 | - | - |
| <i>Mycobacterium tuberculosis</i> F11   | vapBC/RHH-PIN                | TBFG_12137 | TBFG_12138 | - | - |
| <i>Mycobacterium tuberculosis</i> F11   | vapBC/RHH-PIN                | TBFG_12566 | TBFG_12565 | - | - |
| <i>Mycobacterium tuberculosis</i> F11   | vapBC/RHH-PIN                | TBFG_12568 | TBFG_12567 | - | - |
| <i>Mycobacterium tuberculosis</i> F11   | vapBC/RHH-PIN                | TBFG_12570 | TBFG_12571 | - | - |
| <i>Mycobacterium tuberculosis</i> F11   | vapBC/RHH-PIN                | TBFG_12770 | TBFG_12771 | - | - |
| <i>Mycobacterium tuberculosis</i> F11   | vapBC/RHH-PIN                | TBFG_12772 | TBFG_12773 | - | - |
| <i>Mycobacterium tuberculosis</i> F11   | mazEF, ccd or relBE/RHH-MazF | TBFG_12814 | TBFG_12815 | - | - |
| <i>Mycobacterium tuberculosis</i> F11   | -/RHH-GNAT                   | TBFG_12818 | TBFG_12817 | - | - |
| <i>Mycobacterium tuberculosis</i> F11   | vapBC/PHD-PIN                | TBFG_12844 | TBFG_12845 | - | - |
| <i>Mycobacterium tuberculosis</i> F11   | relBE or parDE/PHD-RelE      | TBFG_12882 | TBFG_12881 | - | - |
| <i>Mycobacterium tuberculosis</i> F11   | vapBC/PHD-PIN                | TBFG_13202 | TBFG_13203 | - | - |
| <i>Mycobacterium tuberculosis</i> F11   | relBE/Xre-RelE               | TBFG_13204 | TBFG_13205 | - | - |
| <i>Mycobacterium tuberculosis</i> F11   | -/Xre-COG5654                | TBFG_13209 | TBFG_13208 | - | - |
| <i>Mycobacterium tuberculosis</i> F11   | vapBC/RHH-PIN                | TBFG_13351 | TBFG_13352 | - | - |
| <i>Mycobacterium tuberculosis</i> F11   | relBE or parDE/PHD-RelE      | TBFG_13394 | TBFG_13393 | - | - |
| <i>Mycobacterium tuberculosis</i> F11   | vapBC/PHD-PIN                | TBFG_13418 | TBFG_13419 | - | - |
| <i>Mycobacterium tuberculosis</i> F11   | -/MerR-PIN                   | TBFG_13781 | TBFG_13782 | - | - |
| <i>Mycobacterium tuberculosis</i> H37Ra | vapBC/RHH-PIN                | MRA_0249   | MRA_0248   | - | - |
| <i>Mycobacterium tuberculosis</i> H37Ra | vapBC/RHH-PIN                | MRA_0285   | MRA_0286   | - | - |
| <i>Mycobacterium tuberculosis</i> H37Ra | mazEF, ccd or relBE/RHH-MazF | MRA_0308   | MRA_0307   | - | - |
| <i>Mycobacterium tuberculosis</i> H37Ra | vapBC/RHH-PIN                | MRA_0310   | MRA_0309   | - | - |
| <i>Mycobacterium tuberculosis</i> H37Ra | vapBC/RHH-PIN                | MRA_0556   | MRA_0557   | - | - |
| <i>Mycobacterium tuberculosis</i> H37Ra | vapBC/PHD-PIN                | MRA_0603   | MRA_0604   | - | - |
| <i>Mycobacterium tuberculosis</i> H37Ra | vapBC/AbrB-PIN               | MRA_0606   | MRA_0607   | - | - |
| <i>Mycobacterium tuberculosis</i> H37Ra | vapBC/RHH-PIN                | MRA_0616   | MRA_0615   | - | - |
| <i>Mycobacterium tuberculosis</i> H37Ra | vapBC/RHH-PIN                | MRA_0633   | MRA_0632   | - | - |
| <i>Mycobacterium tuberculosis</i> H37Ra | vapBC/PHD-PIN                | MRA_0636   | MRA_0635   | - | - |
| <i>Mycobacterium tuberculosis</i> H37Ra | vapBC/RHH-PIN                | MRA_0667   | MRA_0667A  | - | - |
| <i>Mycobacterium tuberculosis</i> H37Ra | mazEF, ccd or relBE/RHH-MazF | MRA_0669   | MRA_0670   | - | - |
| <i>Mycobacterium tuberculosis</i> H37Ra | vapBC/RHH-PIN                | MRA_0671   | MRA_0672   | - | - |
| <i>Mycobacterium tuberculosis</i> H37Ra | vapBC/RHH-PIN                | MRA_0757   | MRA_0756   | - | - |
| <i>Mycobacterium tuberculosis</i> H37Ra | -/RHH-GNAT                   | MRA_0927   | MRA_0926   | - | - |

|                                         |                              |          |           |   |   |
|-----------------------------------------|------------------------------|----------|-----------|---|---|
| <i>Mycobacterium tuberculosis</i> H37Ra | vapBC/RHH-PIN                | MRA_1124 | MRA_1123A | - | - |
| <i>Mycobacterium tuberculosis</i> H37Ra | vapBC/RHH-PIN                | MRA_1251 | MRA_1250  | - | - |
| <i>Mycobacterium tuberculosis</i> H37Ra | relBE or parDE/PHD-RelE      | MRA_1255 | MRA_1255A | - | - |
| <i>Mycobacterium tuberculosis</i> H37Ra | vapBC/RHH-PIN                | MRA_1406 | MRA_1407  | - | - |
| <i>Mycobacterium tuberculosis</i> H37Ra | vapBC/RHH-PIN                | MRA_1573 | MRA_1572  | - | - |
| <i>Mycobacterium tuberculosis</i> H37Ra | vapBC/RHH-PIN                | MRA_1730 | MRA_1731  | - | - |
| <i>Mycobacterium tuberculosis</i> H37Ra | vapBC/RHH-PIN                | MRA_1752 | MRA_1751  | - | - |
| <i>Mycobacterium tuberculosis</i> H37Ra | vapBC/RHH-PIN                | MRA_1849 | MRA_1850  | - | - |
| <i>Mycobacterium tuberculosis</i> H37Ra | vapBC/RHH-PIN                | MRA_1963 | MRA_1962  | - | - |
| <i>Mycobacterium tuberculosis</i> H37Ra | relBE/Xre-RelE               | MRA_1964 | MRA_1965  | - | - |
| <i>Mycobacterium tuberculosis</i> H37Ra | RelBE or parDE/RHH-RelE      | MRA_1968 | MRA_1969  | - | - |
| <i>Mycobacterium tuberculosis</i> H37Ra | vapBC/PHD-PIN                | MRA_1971 | MRA_1972  | - | - |
| <i>Mycobacterium tuberculosis</i> H37Ra | vapBC/RHH-PIN                | MRA_1993 | MRA_1994  | - | - |
| <i>Mycobacterium tuberculosis</i> H37Ra | -/COG5642-COG5654            | MRA_2003 | MRA_2004  | - | - |
| <i>Mycobacterium tuberculosis</i> H37Ra | mazEF, ccd or relBE/RHH-MazF | MRA_2006 | MRA_2007  | - | - |
| <i>Mycobacterium tuberculosis</i> H37Ra | vapBC/RHH-PIN                | MRA_2026 | MRA_2025  | - | - |
| <i>Mycobacterium tuberculosis</i> H37Ra | -/COG2442-PIN                | MRA_2035 | MRA_2034  | - | - |
| <i>Mycobacterium tuberculosis</i> H37Ra | relBE/Xre-RelE               | MRA_2038 | MRA_2037  | - | - |
| <i>Mycobacterium tuberculosis</i> H37Ra | -/ArsR-COG3832               | MRA_2050 | MRA_2049  | - | - |
| <i>Mycobacterium tuberculosis</i> H37Ra | mazEF, ccd or relBE/RHH-MazF | MRA_2077 | MRA_2076  | - | - |
| <i>Mycobacterium tuberculosis</i> H37Ra | vapBC/RHH-PIN                | MRA_2117 | MRA_2118  | - | - |
| <i>Mycobacterium tuberculosis</i> H37Ra | vapBC/RHH-PIN                | MRA_2520 | MRA_2519  | - | - |
| <i>Mycobacterium tuberculosis</i> H37Ra | vapBC/RHH-PIN                | MRA_2554 | MRA_2553  | - | - |
| <i>Mycobacterium tuberculosis</i> H37Ra | vapBC/RHH-PIN                | MRA_2557 | MRA_2558  | - | - |
| <i>Mycobacterium tuberculosis</i> H37Ra | vapBC/RHH-PIN                | MRA_2574 | MRA_2573  | - | - |
| <i>Mycobacterium tuberculosis</i> H37Ra | vapBC/RHH-PIN                | MRA_2576 | MRA_2575  | - | - |
| <i>Mycobacterium tuberculosis</i> H37Ra | vapBC/RHH-PIN                | MRA_2578 | MRA_2579  | - | - |
| <i>Mycobacterium tuberculosis</i> H37Ra | vapBC/AbrB-PIN               | MRA_2624 | MRA_2623A | - | - |
| <i>Mycobacterium tuberculosis</i> H37Ra | vapBC/RHH-PIN                | MRA_2630 | MRA_2629A | - | - |
| <i>Mycobacterium tuberculosis</i> H37Ra | vapBC/RHH-PIN                | MRA_2782 | MRA_2783  | - | - |
| <i>Mycobacterium tuberculosis</i> H37Ra | vapBC/RHH-PIN                | MRA_2784 | MRA_2785  | - | - |
| <i>Mycobacterium tuberculosis</i> H37Ra | relBE or parDE/PHD-RelE      | MRA_2891 | MRA_2890  | - | - |
| <i>Mycobacterium tuberculosis</i> H37Ra | vapBC/RHH-PIN                | MRA_2896 | MRA_2895A | - | - |

|                                         |                              |          |          |   |   |
|-----------------------------------------|------------------------------|----------|----------|---|---|
| <i>Mycobacterium tuberculosis</i> H37Ra | vapBC/PHD-PIN                | MRA_3214 | MRA_3215 | - | - |
| <i>Mycobacterium tuberculosis</i> H37Ra | relBE/Xre-RelE               | MRA_3216 | MRA_3217 | - | - |
| <i>Mycobacterium tuberculosis</i> H37Ra | -/Xre-COG5654                | MRA_3221 | MRA_3220 | - | - |
| <i>Mycobacterium tuberculosis</i> H37Ra | vapBC/RHH-PIN                | MRA_3362 | MRA_3363 | - | - |
| <i>Mycobacterium tuberculosis</i> H37Ra | relBE or parDE/PHD-RelE      | MRA_3398 | MRA_3397 | - | - |
| <i>Mycobacterium tuberculosis</i> H37Ra | vapBC/PHD-PIN                | MRA_3424 | MRA_3425 | - | - |
| <i>Mycobacterium tuberculosis</i> H37Ra | vapBC/PHD-PIN                | MRA_3448 | MRA_3447 | - | - |
| <i>Mycobacterium tuberculosis</i> H37Ra | vapBC/RHH-PIN                | MRA_3732 | MRA_3733 | - | - |
| <i>Mycobacterium tuberculosis</i> H37Ra | -/MerR-PIN                   | MRA_3787 | MRA_3788 | - | - |
| <i>Mycobacterium tuberculosis</i> H37Rv | -/-                          | Rv0059   | Rv0060   | - | - |
| <i>Mycobacterium tuberculosis</i> H37Rv | vapBC/RHH-PIN                | Rv0065   | Rv0064A  | - | - |
| <i>Mycobacterium tuberculosis</i> H37Rv | vapBC/RHH-PIN                | Rv0240   | Rv0239   | - | - |
| <i>Mycobacterium tuberculosis</i> H37Rv | mazEF, ccd or relBE/RHH-MazF | Rv0299   | Rv0298   | - | o |
| <i>Mycobacterium tuberculosis</i> H37Rv | vapBC/RHH-PIN                | Rv0301   | Rv0300   | - | o |
| <i>Mycobacterium tuberculosis</i> H37Rv | -/RHH-PIN(toxin)             | Rv0456a  | Rv0456B  | - | - |
| <i>Mycobacterium tuberculosis</i> H37Rv | vapBC/RHH-PIN                | Rv0549c  | Rv0550c  | - | o |
| <i>Mycobacterium tuberculosis</i> H37Rv | vapBC/RHH-PIN                | Rv0582   | Rv0581   | - | o |
| <i>Mycobacterium tuberculosis</i> H37Rv | vapBC/PHD-PIN                | Rv0595c  | Rv0596c  | - | - |
| <i>Mycobacterium tuberculosis</i> H37Rv | vapBC/AbrB-PIN               | Rv0598c  | Rv0599c  | - | - |
| <i>Mycobacterium tuberculosis</i> H37Rv | vapBC/RHH-PIN                | Rv0609   | Rv0608   | - | o |
| <i>Mycobacterium tuberculosis</i> H37Rv | vapBC/-                      | Rv0617   | Rv0616c  | - | - |
| <i>Mycobacterium tuberculosis</i> H37Rv | vapBC/RHH-PIN                | Rv0624   | Rv0623   | - | o |
| <i>Mycobacterium tuberculosis</i> H37Rv | vapBC/PHD-PIN                | Rv0627   | Rv0626   | - | - |
| <i>Mycobacterium tuberculosis</i> H37Rv | vapBC/RHH-PIN                | Rv0656c  | Rv0657c  | - | - |
| <i>Mycobacterium tuberculosis</i> H37Rv | mazEF/RHH-MazF               | Rv0659c  | Rv0660c  | - | - |
| <i>Mycobacterium tuberculosis</i> H37Rv | vapBC/RHH-PIN                | Rv0661c  | Rv0662c  | - | - |
| <i>Mycobacterium tuberculosis</i> H37Rv | vapBC/-                      | Rv0665   | Rv0664   | - | - |
| <i>Mycobacterium tuberculosis</i> H37Rv | vapBC/RHH-PIN                | Rv0749   | Rv0748   | - | o |
| <i>Mycobacterium tuberculosis</i> H37Rv | -/-                          | Rv0836c  | Rv0837c  | - | - |
| <i>Mycobacterium tuberculosis</i> H37Rv | unclassified/-               | Rv0910   | Rv0909   | - | o |
| <i>Mycobacterium tuberculosis</i> H37Rv | -/RHH-GNAT                   | Rv0919   | Rv0918   | - | - |
| <i>Mycobacterium tuberculosis</i> H37Rv | -/-                          | Rv0960   | Rv0959A  | - | - |
| <i>Mycobacterium tuberculosis</i> H37Rv | mazEF/-                      | Rv1102c  | Rv1103c  | - | o |

|                                         |                              |         |         |   |   |
|-----------------------------------------|------------------------------|---------|---------|---|---|
| <i>Mycobacterium tuberculosis</i> H37Rv | vapBC/RHH-PIN                | Rv1114  | Rv1113  | - | o |
| <i>Mycobacterium tuberculosis</i> H37Rv | vapBC/RHH-PIN                | Rv1242  | Rv1241  | - | o |
| <i>Mycobacterium tuberculosis</i> H37Rv | relBE/PHD-RelE               | Rv1246c | Rv1247c | - | o |
| <i>Mycobacterium tuberculosis</i> H37Rv | vapBC/RHH-PIN                | Rv1397c | Rv1398c | - | - |
| <i>Mycobacterium tuberculosis</i> H37Rv | mazEF/-                      | Rv1495  | Rv1494  | - | o |
| <i>Mycobacterium tuberculosis</i> H37Rv | unclassified/-               | Rv1546  | Rv1545  | - | - |
| <i>Mycobacterium tuberculosis</i> H37Rv | vapBC/RHH-PIN                | Rv1561  | Rv1560  | - | o |
| <i>Mycobacterium tuberculosis</i> H37Rv | vapBC/RHH-PIN                | Rv1720c | Rv1721c | - | - |
| <i>Mycobacterium tuberculosis</i> H37Rv | vapBC/RHH-PIN                | Rv1741  | Rv1740  | - | - |
| <i>Mycobacterium tuberculosis</i> H37Rv | vapBC/RHH-PIN                | Rv1838c | Rv1839c | - | - |
| <i>Mycobacterium tuberculosis</i> H37Rv | mazEF/-                      | Rv1942c | Rv1943c | - | o |
| <i>Mycobacterium tuberculosis</i> H37Rv | vapBC/RHH-PIN                | Rv1953  | Rv1952  | - | - |
| <i>Mycobacterium tuberculosis</i> H37Rv | higBA/Xre-RelE               | Rv1955  | Rv1956  | - | o |
| <i>Mycobacterium tuberculosis</i> H37Rv | parDE/RHH-RelE               | Rv1959c | Rv1960c | - | - |
| <i>Mycobacterium tuberculosis</i> H37Rv | -/RHH-RelE(toxin)            | Rv1962c | Rv1963c | - | o |
| <i>Mycobacterium tuberculosis</i> H37Rv | vapBC/RHH-PIN                | Rv1982c | Rv1982a | - | - |
| <i>Mycobacterium tuberculosis</i> H37Rv | -/COG5642-COG5654            | Rv1989c | Rv1990c | - | - |
| <i>Mycobacterium tuberculosis</i> H37Rv | mazEF, ccd or relBE/RHH-MazF | Rv1991c | Rv1991a | - | o |
| <i>Mycobacterium tuberculosis</i> H37Rv | vapBC/RHH-PIN                | Rv2010  | Rv2009  | - | o |
| <i>Mycobacterium tuberculosis</i> H37Rv | -/COG2442-PIN                | Rv2019  | Rv2018  | - | - |
| <i>Mycobacterium tuberculosis</i> H37Rv | relBE/Xre-RelE               | Rv2022c | Rv2021c | - | - |
| <i>Mycobacterium tuberculosis</i> H37Rv | -/ArsR-COG3832               | Rv2035  | Rv2034  | - | - |
| <i>Mycobacterium tuberculosis</i> H37Rv | mazEF, ccd or relBE/RHH-MazF | Rv2063A | Rv2063  | - | o |
| <i>Mycobacterium tuberculosis</i> H37Rv | vapBC/RHH-PIN                | Rv2103c | Rv2104c | - | - |
| <i>Mycobacterium tuberculosis</i> H37Rv | -/-                          | Rv2142c | Rv2142A | - | o |
| <i>Mycobacterium tuberculosis</i> H37Rv | vapBC/PHD-PIN                | Rv2231A | Rv2231B | - | - |
| <i>Mycobacterium tuberculosis</i> H37Rv | -/PHD-PIN(toxin)             | Rv2274c | Rv2274A | - | - |
| <i>Mycobacterium tuberculosis</i> H37Rv | vapBC/RHH-PIN                | Rv2494  | Rv2493  | - | - |
| <i>Mycobacterium tuberculosis</i> H37Rv | vapBC/RHH-PIN                | Rv2527  | Rv2526  | - | - |
| <i>Mycobacterium tuberculosis</i> H37Rv | vapBC/RHH-PIN                | Rv2530c | Rv2530A | - | o |
| <i>Mycobacterium tuberculosis</i> H37Rv | vapBC/RHH-PIN                | Rv2546  | Rv2545  | - | - |
| <i>Mycobacterium tuberculosis</i> H37Rv | vapBC/RHH-PIN                | Rv2548  | Rv2547  | - | o |
| <i>Mycobacterium tuberculosis</i> H37Rv | vapBC/RHH-PIN                | Rv2549c | Rv2550c | - | - |

|                                         |                              |           |           |   |   |
|-----------------------------------------|------------------------------|-----------|-----------|---|---|
| <i>Mycobacterium tuberculosis</i> H37Rv | vapBC/AbrB-PIN               | Rv2596    | Rv2595    | - | - |
| <i>Mycobacterium tuberculosis</i> H37Rv | vapBC/RHH-PIN                | Rv2602    | Rv2601A   | - | o |
| <i>Mycobacterium tuberculosis</i> H37Rv | unclassified/-               | Rv2653c   | Rv2654c   | - | o |
| <i>Mycobacterium tuberculosis</i> H37Rv | -/RHH-PIN(antitoxin)         | Rv2697c   | Rv3697A   | - | - |
| <i>Mycobacterium tuberculosis</i> H37Rv | vapBC/RHH-PIN                | Rv2757c   | Rv2758c   | - | o |
| <i>Mycobacterium tuberculosis</i> H37Rv | vapBC/RHH-PIN                | Rv2759c   | Rv2760c   | - | - |
| <i>Mycobacterium tuberculosis</i> H37Rv | mazEF, ccd or relBE/RHH-MazF | Rv2801c   | Rv2801A   | - | o |
| <i>Mycobacterium tuberculosis</i> H37Rv | -/-                          | Rv2826c   | Rv2827c   | - | - |
| <i>Mycobacterium tuberculosis</i> H37Rv | vapBC/PHD-PIN                | Rv2829c   | Rv2830c   | - | o |
| <i>Mycobacterium tuberculosis</i> H37Rv | -/-                          | Rv2863    | Rv2862A   | - | - |
| <i>Mycobacterium tuberculosis</i> H37Rv | relBE/PHD-RelE               | Rv2866    | Rv2865    | - | o |
| <i>Mycobacterium tuberculosis</i> H37Rv | vapBC/RHH-PIN                | Rv2872    | Rv2871    | - | o |
| <i>Mycobacterium tuberculosis</i> H37Rv | vapBC/PHD-PIN                | Rv3180c   | Rv3181c   | - | - |
| <i>Mycobacterium tuberculosis</i> H37Rv | relBE/Xre-RelE               | Rv3182    | Rv3183    | - | - |
| <i>Mycobacterium tuberculosis</i> H37Rv | -/Xre-COG5654                | Rv3189    | Rv3188    | - | - |
| <i>Mycobacterium tuberculosis</i> H37Rv | vapBC/RHH-PIN                | Rv3320c   | Rv3321c   | - | - |
| <i>Mycobacterium tuberculosis</i> H37Rv | relBE/PHD-RelE               | Rv3358    | Rv3357    | - | o |
| <i>Mycobacterium tuberculosis</i> H37Rv | vapBC/PHD-PIN                | Rv3384c   | Rv3385c   | - | o |
| <i>Mycobacterium tuberculosis</i> H37Rv | vapBC/PHD-PIN                | Rv3408    | Rv3407    | - | o |
| <i>Mycobacterium tuberculosis</i> H37Rv | -/MerR-PIN                   | Rv3749c   | Rv3750c   | - | - |
| <i>Bacillus anthracis</i> str. Ames     | mazEF/RHH-MazF               | BA_0254   | BA_0253   | - | - |
| <i>Bacillus anthracis</i> str. Ames     | -/Xre-Bro                    | BA_3827   | BA_3828   | - | - |
| <i>Bacillus anthracis</i> str. Ames     | -/Xre-COG2856                | BA_3830   | BA_3829   | - | - |
| <i>Bacillus anthracis</i> str. Ames     | -/ArsR-COG3832               | BA_4963   | BA_4962   | - | - |
| <i>Bacillus anthracis</i> str. Sterne   | mazEF/RHH-MazF               | BAS0240   | BAS0239   | - | o |
| <i>Bacillus anthracis</i> str. Sterne   | -/Xre-Bro                    | BAS3543   | BAS3544   | - | - |
| <i>Bacillus anthracis</i> str. Sterne   | -/Xre-COG2856                | BAS3546   | BAS3545   | - | - |
| <i>Bacillus anthracis</i> str. Sterne   | -/ArsR-COG3832               | BAS4607   | BAS4606   | - | - |
| <i>Bacillus cereus</i> ATCC 10987       | mazEF/RHH-MazF               | BCE_0274  | BCE_0273  | - | - |
| <i>Bacillus cereus</i> ATCC 10987       | -/Xre-COG2856                | BCE_4623  | BCE_4622  | - | - |
| <i>Bacillus cereus</i> ATCC 10987       | -/ArsR-COG3832               | BCE_4853  | BCE_4852  | - | - |
| <i>Bacillus cereus</i> ATCC 10987       | -/HEPN-MNT                   | BCE_A0102 | BCE_A0103 | - | - |
| <i>Bacillus cereus</i> ATCC 14579       | mazEF/RHH-MazF               | BC0266    | BC0265    | - | - |

|                                                          |                |                   |                     |   |   |
|----------------------------------------------------------|----------------|-------------------|---------------------|---|---|
| <i>Bacillus cereus</i> ATCC 14579                        | -/Xre-Bro      | BC3702            | BC3703              | - | - |
| <i>Bacillus cereus</i> ATCC 14579                        | -/ArsR-COG3832 | BC4709            | BC4708              | - | - |
| <i>Bacillus cereus</i> E33L                              | mazEF/RHH-MazF | BCZK0228          | BCZK0227            | - | - |
| <i>Bacillus cereus</i> E33L                              | -/Xre-Bro      | BCZK3457          | BCZK3458            | - | - |
| <i>Bacillus cereus</i> E33L                              | -/Xre-COG2856  | BCZK3460          | BCZK3459            | - | - |
| <i>Bacillus cereus</i> E33L                              | -/ArsR-COG3832 | BCZK4461          | BCZK4460            | - | - |
| <i>Bacillus cereus</i> E33L                              | -/HEPN-MNT     | pE33L466_026<br>9 | pE33L466_027<br>0   | - | - |
| <i>Bacillus subtilis</i> subsp. <i>subtilis</i> str. 168 | bsrG-SR4/-     | BSU21546          | BSU_misc_RN<br>A_77 | - | o |
| <i>Bacillus subtilis</i> subsp. <i>subtilis</i> str. 168 | rtbD-rtbE/-    | BSU39300          | BSU39290            | - | o |
| <i>Bacillus subtilis</i> subsp. <i>subtilis</i> str. 168 | mazEF/RHH-MazF | BSU04660          | BSU04650            | - | o |
| <i>Bacillus subtilis</i> subsp. <i>subtilis</i> str. 168 | -/Xre-COG2856  | BSU04810          | BSU04820            | - | - |
| <i>Bacillus subtilis</i> subsp. <i>subtilis</i> str. 168 | SpoIIISAB/-    | BSU12830          | BSU12820            | - | o |
| <i>Bacillus subtilis</i> subsp. <i>subtilis</i> str. 168 | -/Xre-GNAT     | BSU19060          | BSU19050            | - | - |

## Reference

1. Shao, Y.; Harrison, E.M.; Bi, D.; Tai, C.; He, X.; Ou, H.Y.; Rajakumar, K.; Deng, Z. TADB: A web-based resource for Type 2 toxin-antitoxin loci in bacteria and archaea. *Nucleic Acids Res* **2011**, *39*, D606-D611.
